# Supplementary material for: ZNF131 suppresses centrosome fragmentation in glioblastoma stem-like cells through regulation of HAUS5
Source: PubMed Central journal article supplement (PMC5564707; doi:10.18632/oncotarget.18153), 2017-05-24
Supplement: oncotarget-08-48545-s001.pdf [file oncotarget-08-48545-s001.pdf]

## ZNF131 suppresses centrosome fragmentation in glioblastoma stem-like cells through regulation of HAUS5

### Supplementary Material

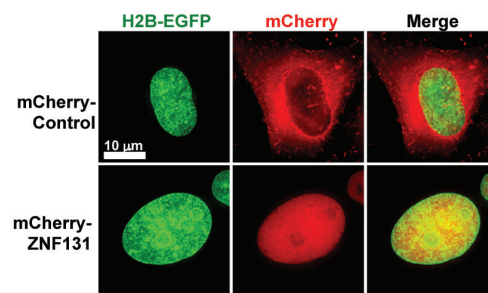

**Supplementary Figure S1. Localization of mCherry-ZNF131 to the nucleus of GSC-0131 cells.** The mCherry was fused to the N-terminal of the ORF in the pGUM lentiviral expression vector. GSC-0131 cells were infected and ~2 days after selection, the expression of fusion protein was visualised using Delta vision imaging system.

**A**

|   | PMID     | Name                                                                                                | pValue   |
|---|----------|-----------------------------------------------------------------------------------------------------|----------|
| ⊞ | 26638075 | A Dynamic Protein Interaction Landscape of the Human Centrosome-Cilium Interface.                   | 1.60E-11 |
|   | 25921289 | Temporal proteomics of NGF-TrkA signaling...                                                        | 3.58E-09 |
|   | 17081983 | Global, in vivo, and site-specific phosphorylation dynamics in signaling networks.                  | 1.96E-08 |
|   | 19946888 | Defining the membrane proteome of NK cells.                                                         | 8.80E-08 |
|   | 24711643 | Identifying biological pathways that underlie primordial short stature using network analysis.      | 2.66E-07 |
|   | 20467437 | Direct interaction between hnRNP-M and CDC5L/PLRG1 proteins affects alternative splice site choice. | 3.63E-07 |
|   | 25609649 | Proteomic analyses reveal distinct chromatin-associated and soluble transcription factor complexes. | 5.74E-07 |
|   | 25281560 | Interactome mapping of chromatin-associated protein complexes.                                      | 7.16E-07 |
| ⊘ | 20301500 | Joubert Syndrome and Related Disorders                                                              | 1.66E-06 |
| ⊘ | 21633164 | Mutations in KIF7 link Joubert syndrome with Sonic Hedgehog signaling and microtubule dynamics.     | 3.95E-06 |

**B**

|                   | <i>ZNF131</i> regulated mRNAs |          |          |
|-------------------|-------------------------------|----------|----------|
|                   | GSC-0131                      | GSC-G166 | GSC-0827 |
| ⊞ <i>CCDC113</i>  | -4.41                         | -1.88    | -2.91    |
| ⊘ <i>HAUS5</i>    | -2.19                         | -1.21    | -1.43    |
| ⊞ <i>ZNF131</i>   | -1.69                         | -1.14    | -1.20    |
| ⊘ <i>NPHP1</i>    | -1.69                         | -1.05    | -0.57    |
| ⊞ <i>MIF4GD</i>   | -1.53                         | -0.65    | -0.89    |
| ⊘ <i>TMEM237</i>  | -1.19                         | -0.66    | -1.15    |
| ⊞ <i>LCLAT1</i>   | -0.80                         | -0.32    | -0.75    |
| ⊘ <i>KIF7</i>     | -0.77                         | -0.78    | -1.91    |
| ⊞ <i>AP2B1</i>    | -0.75                         | -0.22    | -0.23    |
| ⊞ <i>LBR</i>      | -0.55                         | -0.17    | -0.21    |
| ⊞ <i>C21orf2</i>  | -0.53                         | -0.61    | -0.44    |
| ⊞ <i>NDUFV1</i>   | -0.52                         | -0.26    | -0.23    |
| ⊞ <i>TMEM230</i>  | -0.41                         | -0.30    | -0.20    |
| ⊞ <i>ARF5</i>     | -0.37                         | -0.23    | -0.34    |
| ⊞ <i>SMARCAD1</i> | -0.32                         | -0.22    | -0.24    |
| ⊞ <i>UXT</i>      | -0.23                         | -0.22    | -0.26    |
| ⊞ <i>NUP155</i>   | 0.43                          | 0.31     | 0.21     |
| ⊞ <i>SMPD4</i>    | 0.48                          | 0.36     | 0.21     |
| ⊞ <i>LONP1</i>    | 0.65                          | 0.45     | 0.19     |

⊞Centrosome-Cilium Interface

⊘Joubert Syndrome and Related Disorders

⊘Microtubule nucleation

**Supplementary Figure S2. Gene Set Enrichment Analysis for genes whose expression is changed by ZNF131 knockdown in GSCs. (A)** Enriched gene sets arising from specific publications (ToppGene Suite; reference #22). **(B)** Gene expression data of the genes scoring in “Centrosome-Cilium Interface” and “Joubert Syndrome and Related Disorders” from (A). Values are log2-fold-change of shZNF131 versus shControl samples. Experiments were performed according to Methods.

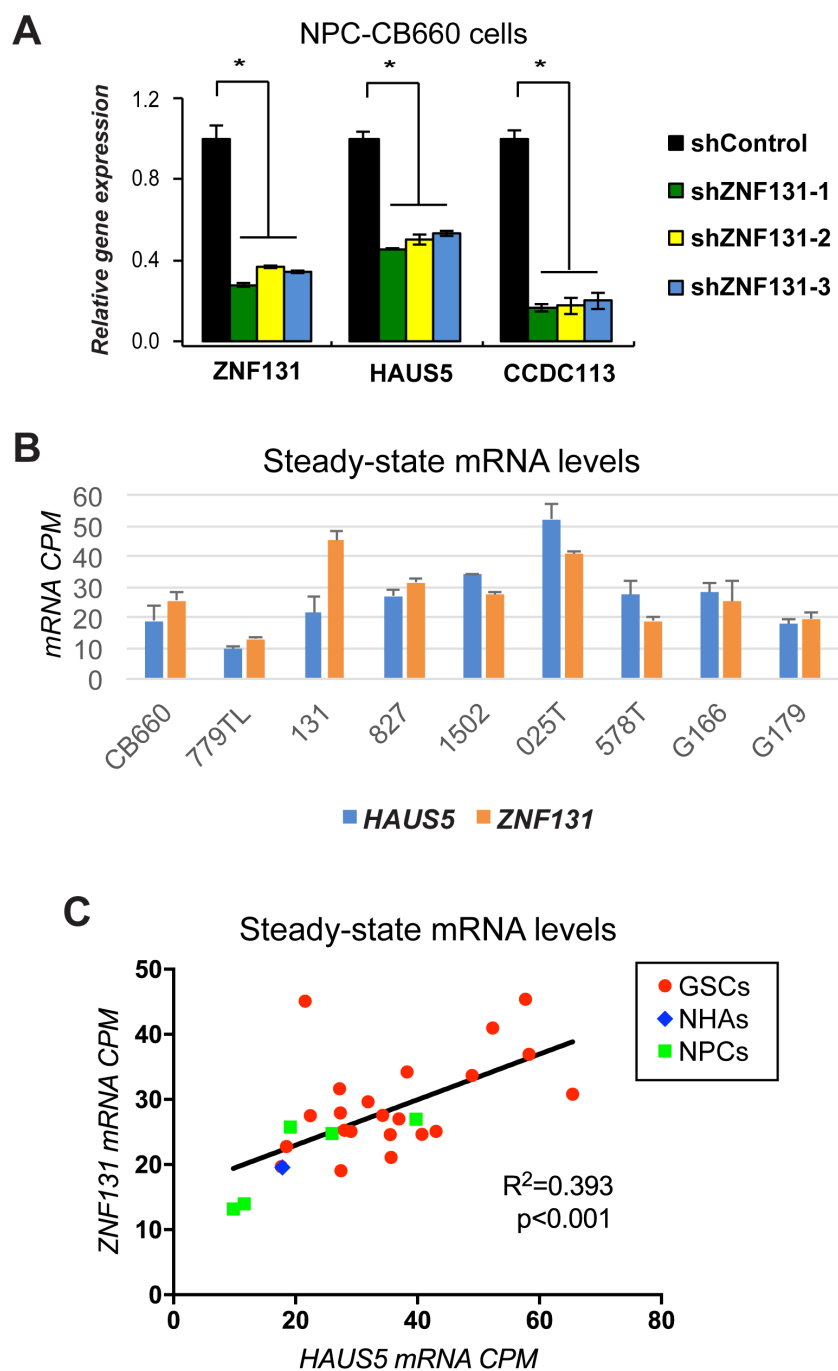

**Supplementary Figure S3. Further examination of relationship between ZNF131 and HAUS5 gene expression.** (A) RT-qPCR confirmation of shZNF131-dependent downregulation of ZNF131, HAUS5, and CCDC113 in NPCs. Experiments were performed as in Figure 2. (B) RNA-seq results for HAUS5 and ZNF131 for NPCs and GSCs shown in Figure 1C. NPC-CB660 and NPC-779TL are resistant, while all GSCs were shZNF131 sensitive. (C) More extensive RNA-seq comparisons of 28 different cell isolates, including NPCs, normal human astrocytes (NHA) and GSCs. RNA-seq data is from reference # . CPM = counts per million reads mapped.

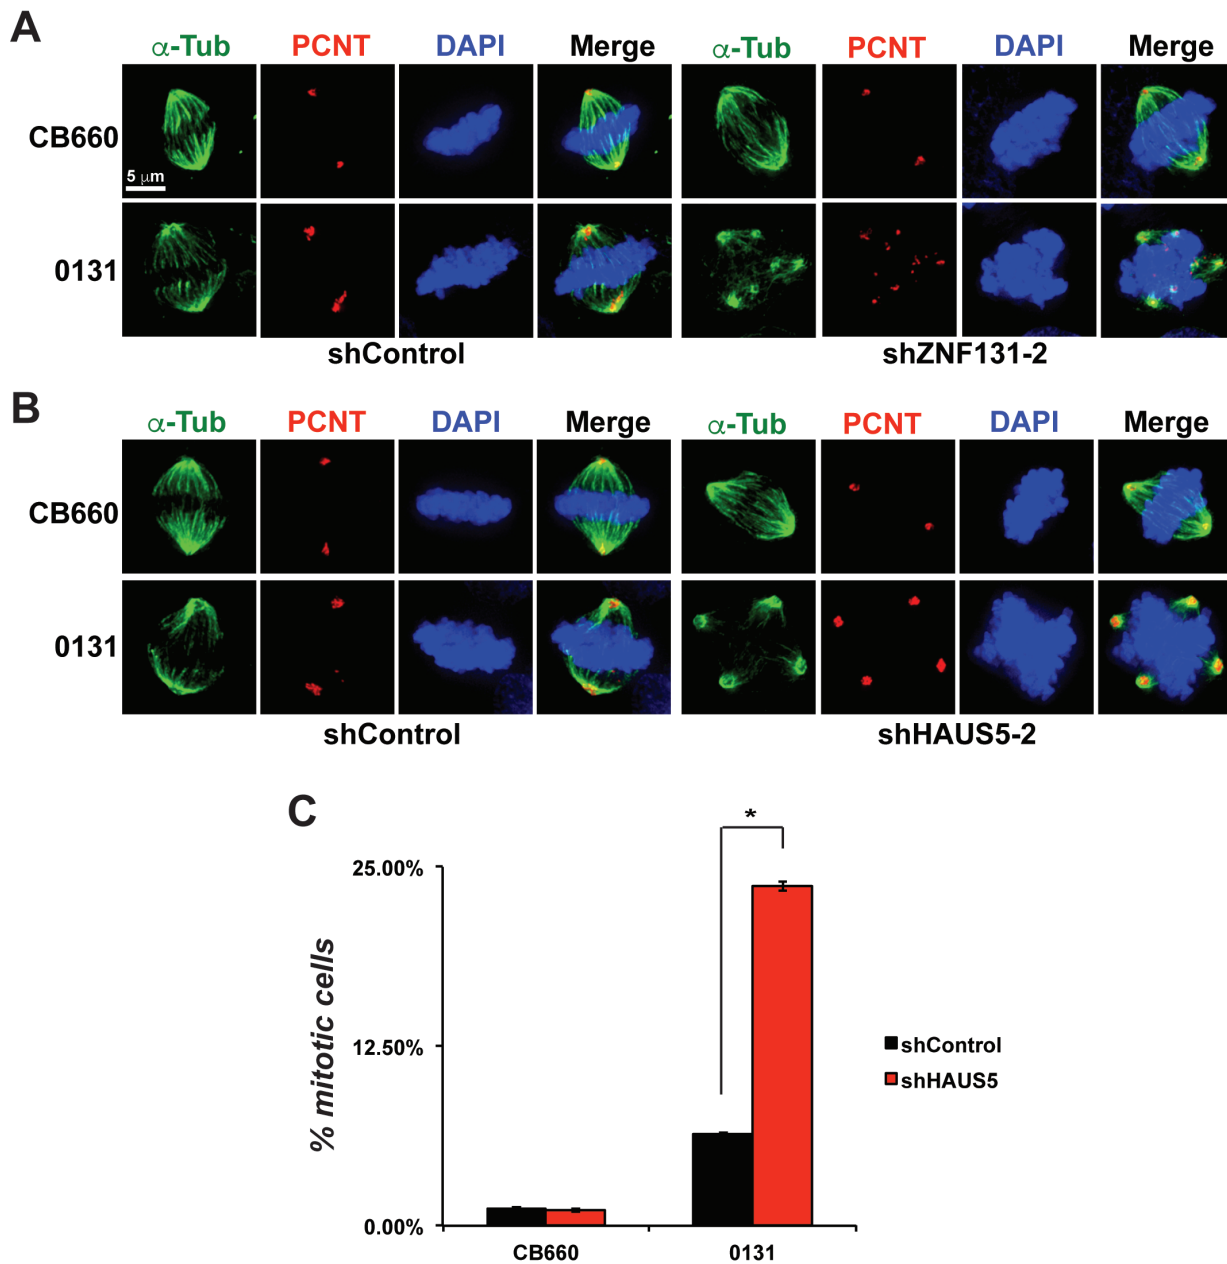

**Supplementary Figure S4. *ZNF131* and *HAUS5* kd cause centrosome fragmentation and multipolar spindle formation in GSC-0131 but not NPC-CB660 cells. (A) & (B)** Representative images of NPC-CB660 and GSC-0131 cells after knockdown of *ZNF131* or *HAUS5*. Cells were stained for pericentrin and tubulin 48hrs after selection for LV-shRNAs according to Methods. Centrosome size was used as a surrogate for multipolarity in these experiments, which showed dramatic differences (Fig. 5). **(C)** Mitotic index dramatically increases in GSC-0131 but not NPC-CB660 after *HAUS5* kd, similar to *ZNF131* kd (Fig. 1). \*indicates p-value<.001.

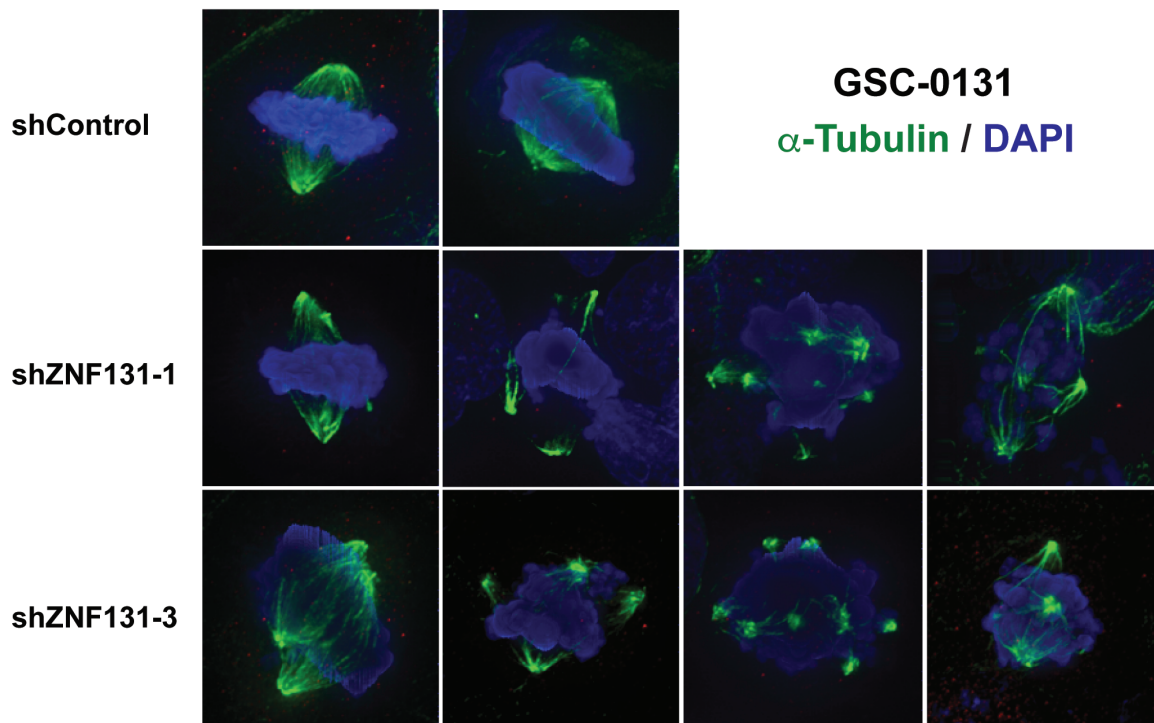

**Supplementary Figure S5. Multiple *ZNF131* shRNAs cause centrosome fragmentation and multipolar spindle formation in GSC-0131 cells.** Representative images of GSC-0131 cells after knockdown of *ZNF131* using two additional shRNAs, which were validated in Figure 1 for knockdown of gene expression and viability loss in GSCs. Cells were stained for tubulin 48hrs after selection for LV-shRNAs according to Methods.

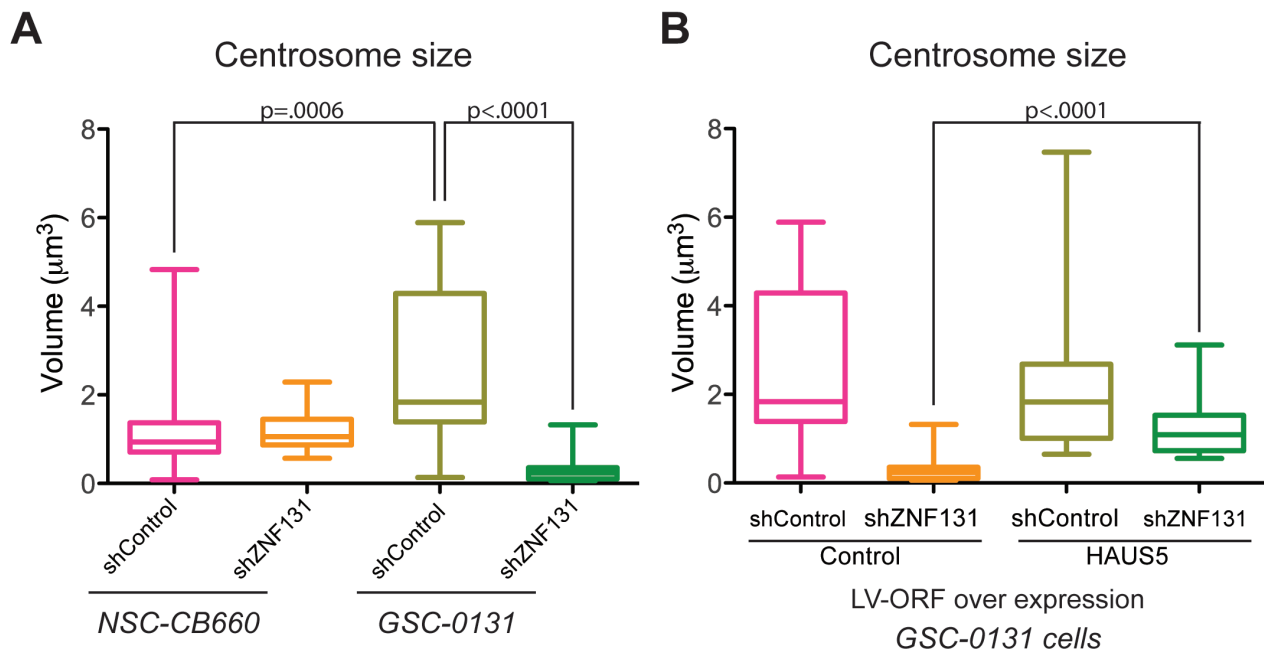

**Supplementary Figure S6. Measurement of centrosome size in GSCs and NPCs after ZNF131 knockdown and complementation with HAUS5. (A)** ZNF131 kd causes reduction in centrosome size in GSCs but not NPCs. Centrosome size was measured using pericentrin staining as outlined in Methods. **(B)** Ectopic expression of HAUS5 ORF complements loss of centrosome size in GSC-0131 cells. Cells were first infected with LV containing control or HAUS5 ORF followed by LV-shRNA and assayed 48hrs after selection (n=31 for each group).

**Gene expression of Augmin/HAUS complex subunits (CPM)**

|              | CB660 | 779TL | 131   | 827    | 025T   | 1502  | 578T   | G166  | G179  |
|--------------|-------|-------|-------|--------|--------|-------|--------|-------|-------|
| <b>HAUS1</b> | 21.25 | 8.13  | 32.67 | 66.77  | 39.89  | 30.91 | 24.60  | 29.46 | 21.74 |
| <b>HAUS2</b> | 31.58 | 14.58 | 49.50 | 53.93  | 49.26  | 50.67 | 42.67  | 52.85 | 26.07 |
| <b>HAUS3</b> | 17.49 | 10.15 | 21.63 | 41.04  | 32.97  | 31.96 | 20.38  | 29.69 | 25.36 |
| <b>HAUS4</b> | 22.03 | 8.95  | 25.33 | 83.22  | 11.60  | 16.77 | 17.21  | 42.39 | 27.85 |
| <b>HAUS5</b> | 19.12 | 9.79  | 21.57 | 27.21  | 52.33  | 34.27 | 27.42  | 28.03 | 17.68 |
| <b>HAUS6</b> | 51.02 | 24.30 | 63.44 | 197.12 | 245.90 | 94.85 | 109.19 | 86.52 | 39.81 |
| <b>HAUS7</b> | 6.61  | 10.83 | 29.81 | 39.00  | 22.54  | 23.44 | 17.26  | 18.99 | 17.60 |
| <b>HAUS8</b> | 5.90  | 2.04  | 17.95 | 25.79  | 17.81  | 17.35 | 16.99  | 13.06 | 13.96 |

**Supplementary Figure S7. Augmin/HAUS complex subunit gene expression.** RNA-seq results for HAUS5 and ZNF131 for NPCs and GSCs shown in Figure 1C. NPC-CB660 and NPC-779TL are resistant, while all GSCs were shZNF131 sensitive. RNA-seq data is from reference #29. Values are counts per million reads mapped.
